# Supplementary material for: Sulfur-Mediated-Alleviation of Aluminum-Toxicity in Citrus grandis Seedlings
Source: MDPI journal article supplement (doi:10.3390/ijms18122570), 2017-12-03
Supplement: s1 [file s1]

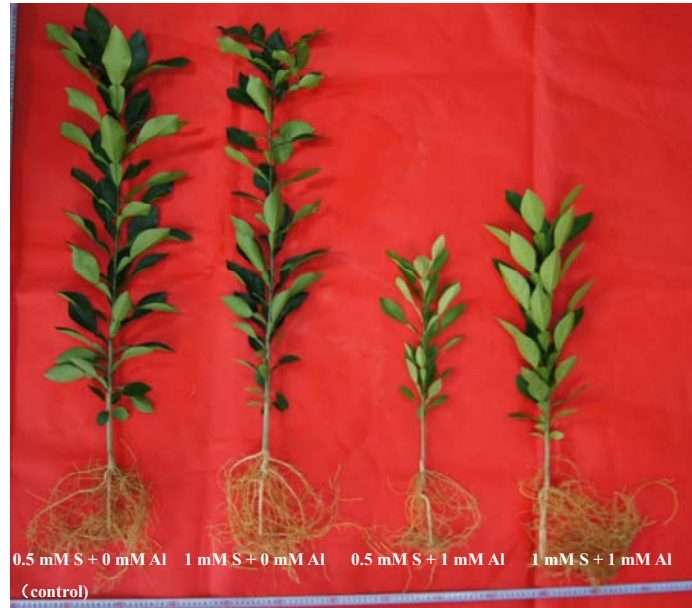

**Supplementary Figure S1.** Effects of S and Al interactions on *C. grandis* seedling growth.

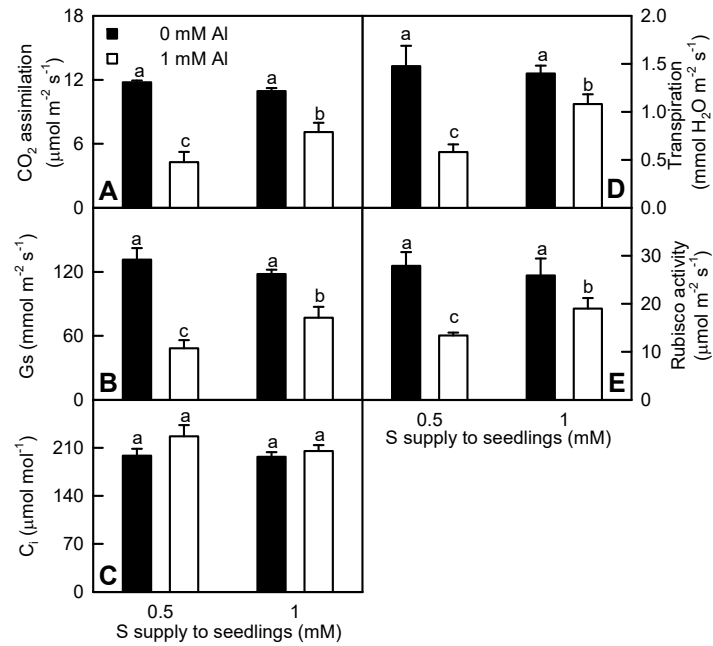

**Supplementary Figure S2.** Effects of S and Al interactions on leaf gas exchange and Rubisco activity. Bars represent means  $\pm$  SE ( $n = 3 - 5$ ). Differences among four treatments were analyzed by two (Al levels)  $\times$  two (S levels) ANOVA. Different letters indicate a significant difference at  $P < 0.05$ .

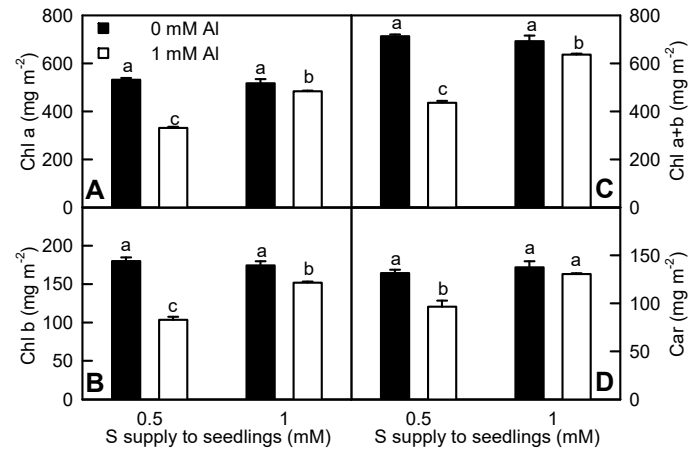

**Supplementary Figure S3.** Effects of S and Al interactions on leaf pigments. Bars represent means  $\pm$  SE ( $n = 4$ ). Differences among four treatments were analyzed by two (Al levels)  $\times$  two (S levels) ANOVA. Different letters above the bars indicate a significant difference at  $P < 0.05$ .

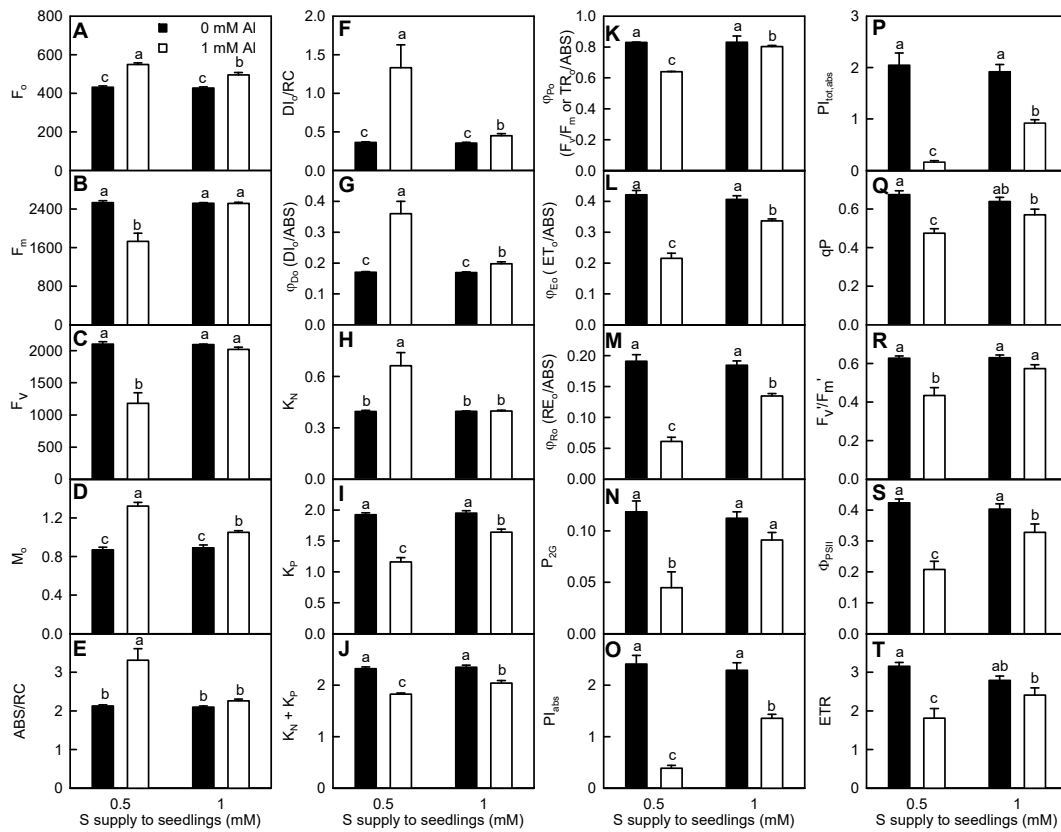

**Supplementary Figure S4.** Effects of S and Al interactions on 20 fluorescence parameters in leaves. Bars represent means  $\pm$  SE ( $n = 4 - 18$ ). Differences among four treatments were analyzed by two (Al levels)  $\times$  two (S levels) ANOVA. Different letters above the bars indicate a significant difference at  $P < 0.05$ .

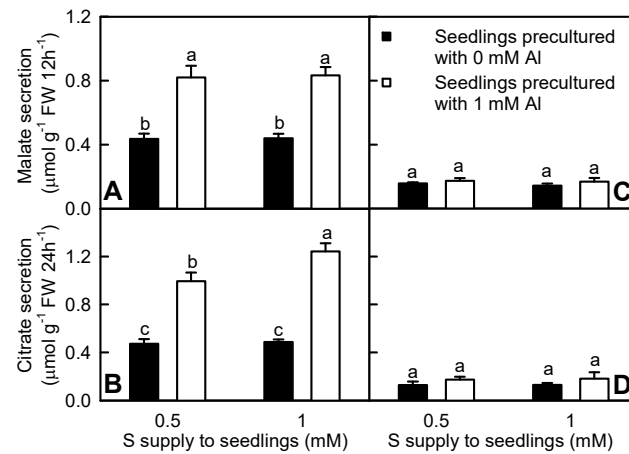

**Supplementary Figure S5.** Al-induced secretion of malate and citrate by excised roots from seedlings submitted to different S and Al levels for 18 weeks. Malate and citrate secretion from excised roots was measured after 12 or 24 h incubation, respectively in 0.5 mM  $\text{CaCl}_2 + 0.5 \text{ mM AlCl}_3 \cdot 6\text{H}_2\text{O}$  (A and B) or 0.5 mM  $\text{CaCl}_2$  (C and D) solution, pH 4.1-4.2. Bars represent means  $\pm$  SE ( $n = 4$ ). Differences among four treatments were analyzed by two (Al levels)  $\times$  two (S levels) ANOVA. Different letters above the bars indicate a significant difference at  $P < 0.05$ .
